# Supplementary material
Source: PubMed Central journal article supplement (PMC10015654)
Supplement: NIHMS1877147-supplement-Supplementary_Material.pdf [file NIHMS1877147-supplement-Supplementary_Material.pdf]

## Supplemental Materials

|                                                                                                                   |   |
|-------------------------------------------------------------------------------------------------------------------|---|
| Additional Information on Search Strategy .....                                                                   | 1 |
| Effects of Air Pollution Exposure on Internalizing and Brain Outcomes Across Exposure<br>Estimation Methods ..... | 1 |
| Publication License for Figure 4 .....                                                                            | 2 |

### *Additional Information on Search Strategy*

The following search terms were applied for search 1: ("air pollution" OR "particulate matter" OR ozone OR "polycyclic aromatic hydrocarbons" OR "volatile organic compounds" OR TRAP) AND (anxiety OR depression). This search retrieved 942 studies. For search 2, the following search terms were used: ("air pollution" OR "particulate matter" OR ozone OR "polycyclic aromatic hydrocarbons" OR "volatile organic compounds" OR TRAP) AND (hippocampus OR amygdala OR infralimbic OR cingulate OR prefrontal OR vmPFC OR prelimbic OR Cg1 OR Cg2).

### *Effects of Air Pollution Exposure on Internalizing and Brain Outcomes Across Exposure Estimation Methods*

For literature search 1, within studies that used exposure assessment models, 64% found increased internalizing symptoms, 12% found mixed effects (i.e., increase in depression, no effect for anxiety), and 24% found no effects of exposure. Only two studies utilized personal air monitors, with one finding increased internalizing behavior and the other finding mixed effects. Within studies using estimates from fixed ground monitors, 88% found increased internalizing symptoms and behaviors, 3% found mixed effects, and 9% found no effects.

For literature search 2, all of the six studies that used exposure assessment models reported significant neurobiological effects on frontolimbic brain regions. Only one study used personal air monitors, and this study found significant neurobiological effects. No studies included in the literature search utilized estimates from fixed ground monitors.

Of note, the directionality of results is consistent within different modeling techniques, suggesting overall similar patterns.

## Confirmation of Publication and Licensing Rights

May 18th, 2022  
Science Suite Inc.

**Subscription:** Individual  
**Agreement number:** SL23XKCB4E  
**Journal name:** Neurotoxicology

To whom this may concern,

This document is to confirm that Jeffrey Strawn has been granted a license to use the BioRender content, including icons, templates and other original artwork, appearing in the attached completed graphic pursuant to BioRender's [Academic License Terms](#). This license permits BioRender content to be sublicensed for use in journal publications.

All rights and ownership of BioRender content are reserved by BioRender. All completed graphics must be accompanied by the following citation: "Created with BioRender.com".

BioRender content included in the completed graphic is not licensed for any commercial uses beyond publication in a journal. For any commercial use of this figure, users may, if allowed, recreate it in BioRender under an Industry BioRender Plan.

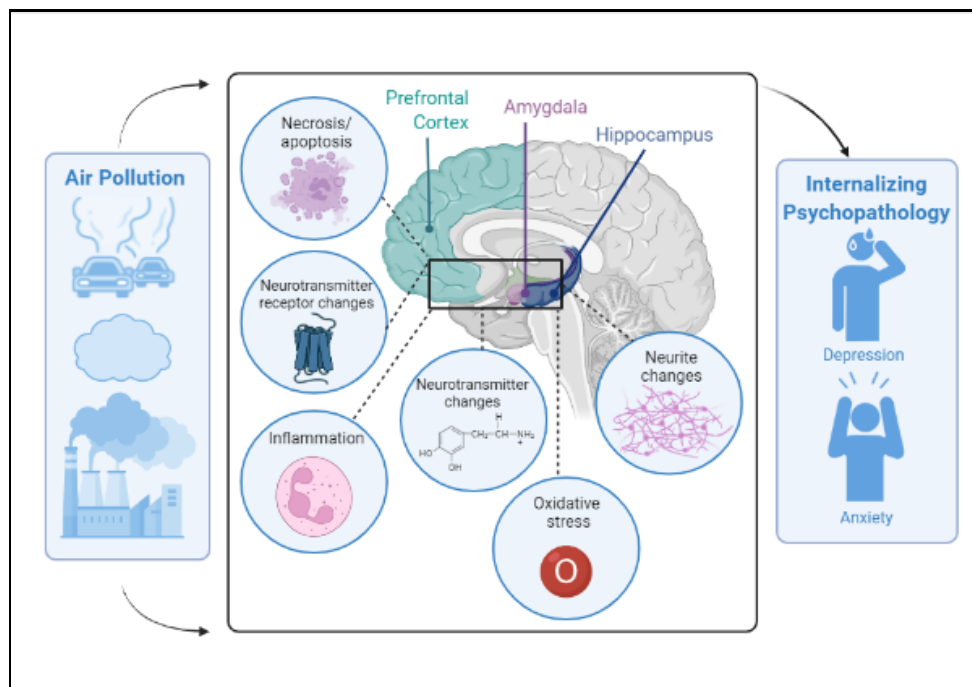

For any questions regarding this document, or other questions about publishing with BioRender refer to our [BioRender Publication Guide](#), or contact BioRender Support at [support@biorender.com](mailto:support@biorender.com).
